# Supplementary material for: A hydrothermal route for synthesizing highly luminescent sulfur- and nitrogen-co-doped carbon dots as nanosensors for Hg2+
Source: Royal Society of Chemistry journal article supplement (doi:10.1039/c6ra16357b), 2016-01-01
Supplement: c6ra16357b1.pdf [file c6ra16357b1.pdf]

## Supporting Information

### A hydrothermal route for synthesizing high luminescent sulfur- and nitrogen-co-doped carbon dots as nanosensor for Hg<sup>2+</sup>

Chunfeng Wang,<sup>a,b</sup>Dong Sun,<sup>a</sup>Yujuan Chen<sup>a</sup> and KeleiZhuo<sup>a\*</sup>

<sup>1</sup>Collaborative Innovation Center of Henan Province for Green Manufacturing of Fine Chemicals, Key Laboratory of Green Chemical Media and Reactions, Ministry of Education, School of Chemistry and Chemical Engineering, Henan Normal University, Xinxiang, Henan 453007, P. R. China. E-mail: [klzhuo@263.net](mailto:klzhuo@263.net); Fax: +86-373-3329056; Tel: +86-373-3329056.

<sup>2</sup>School of Life Science, Henan Normal University, Xinxiang, Henan 453007, P. R. China.

#### Contents

Fig. S1 Raman spectrum of S/N-CDs-1.

Fig. S2 Effects of various conditions on the fluorescence intensity of the S/N-CDs-1: (a) storage time; (b) ionic strengths (ionic strengths were controlled by various concentrations of NaCl in aqueous solution); (c) pH.

Fig. S3  $F/F_0$  of the S/N-CDs-1 in PBS (10 mM, pH 7.0) with 40  $\mu$ M different metal ions.  $F$  and  $F_0$  correspond to the fluorescence intensities of the S/N-CDs-1 with and without 40 mM of different metal ions, respectively.

Table S1 Results of Hg<sup>2+</sup> detection in river water using photoluminescent S/N-CDs-1 ( $n=3$ ).

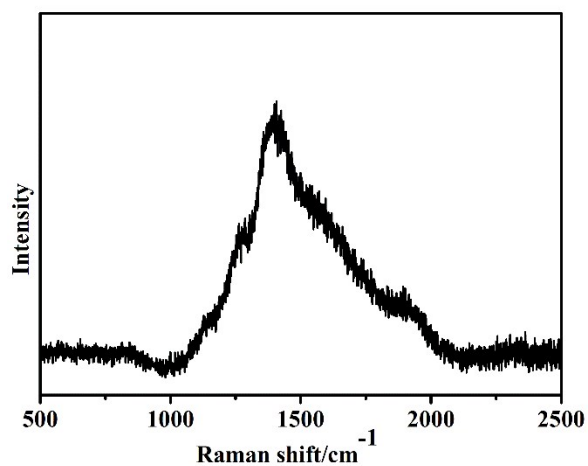

Fig. S1 Raman spectrum of the S/N-CDs-1.

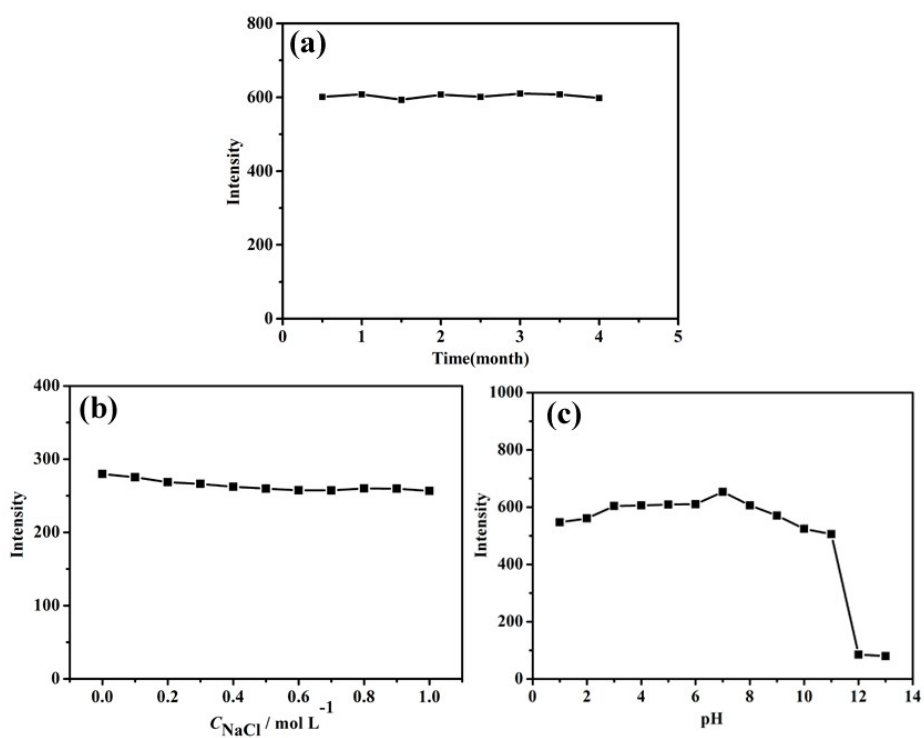

Fig.S2 Effects of various conditions on the fluorescence intensity of the S/N-CDs-1:(a)storage time; (b) ionic strengths (ionic strengths were controlled by various concentrations of NaCl in aqueous solution); (c) pH.

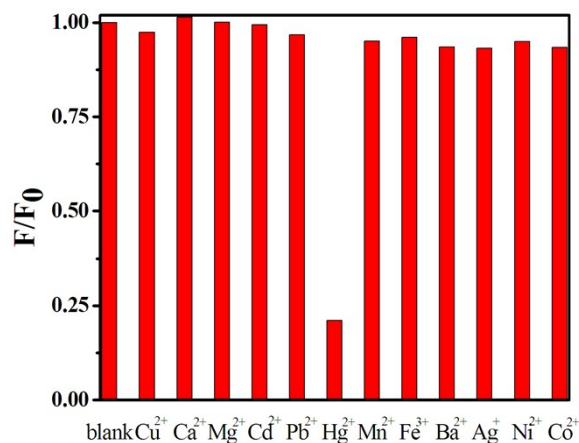

Fig.S3  $F/F_0$  of the S/N-CDs-1 in PBS (10 mM, pH 7.0) with 40  $\mu\text{M}$  different metal ions.  $F$  and  $F_0$  correspond to the fluorescence intensities of the S/N-CDs-1 with and without 40 mM of different metal ions, respectively.

Table S1 Results of  $\text{Hg}^{2+}$  detection in river water using photoluminescent S/N-CDs-1 ( $n=3$ ).

| Samples       | Added $\text{Hg}^{2+}$ / $\mu\text{M}$ | Found $\text{Hg}^{2+}$ / $\mu\text{M}$ | RSD / % | Recovery / % |
|---------------|----------------------------------------|----------------------------------------|---------|--------------|
| river water 1 | 0                                      | No detected                            | —       | —            |
| river water 2 | 30.0                                   | 29.6                                   | 1.9     | 98.7         |
| river water 3 | 60.0                                   | 62.1                                   | 1.2     | 103.5        |
